# Supplementary material
Source: publisher site journal article supplement (http://www.kjim.org/upload/media/kjim-2022-104-suppl1.pdf)
Supplement: Supplementary file 1 [file kjim-2022-104-suppl1.pdf]

**Supplementary Table 1. The change of the bronchitis severity score before and after medication**

| Variable                    | DW1601<br>(n = 67) | DW16011<br>(n = 70) | <i>P. sidoides</i><br>(n = 64) | Difference (95% CI) <sup>a</sup> | Difference (95% CI) <sup>b</sup> | p value <sup>c</sup> | p value <sup>d</sup> |
|-----------------------------|--------------------|---------------------|--------------------------------|----------------------------------|----------------------------------|----------------------|----------------------|
| <b>Total score of BSS</b>   |                    |                     |                                |                                  |                                  |                      |                      |
| Baseline score              | 6.2 ± 1.0          | 6.0 ± 1.1           | 6.2 ± 1.1                      |                                  |                                  |                      |                      |
| Score at 4 days             | 2.6 ± 1.5          | 3.4 ± 1.7           | 3.5 ± 1.8                      | -0.9 ± 0.3 (-1.37 to -0.35)      | -0.9 ± 0.3 (-1.44 to -0.40)      | 0.001 <sup>a</sup>   | 0.001 <sup>a</sup>   |
| Score at 7 days             | 0.7 ± 0.9          | 1.6 ± 1.5           | 1.5 ± 1.8                      | -0.9 ± 0.2 (-1.31 to -0.54)      | -0.8 ± 0.2 (-1.24 to -0.32)      | < 0.001 <sup>a</sup> | 0.001 <sup>a</sup>   |
| <b>Symptom score in BSS</b> |                    |                     |                                |                                  |                                  |                      |                      |
| <b>Cough</b>                |                    |                     |                                |                                  |                                  |                      |                      |
| Baseline score              | 2.9 ± 0.6          | 2.8 ± 0.5           | 2.9 ± 0.6                      |                                  |                                  |                      |                      |
| Score at 4 days             | 1.4 ± 0.7          | 1.7 ± 0.7           | 2.0 ± 0.9                      | -0.3 ± 0.1 (-0.54 to -0.04)      | -0.5 ± 0.1 (-0.78 to -0.23)      | 0.022 <sup>a</sup>   | 0.001 <sup>a</sup>   |
| Score at 7 days             | 0.4 ± 0.5          | 0.8 ± 0.9           | 0.8 ± 1.0                      | -0.4 ± 0.1 (-0.63 to -0.14)      | -0.4 ± 0.1 (-0.67 to -0.12)      | 0.002 <sup>a</sup>   | 0.005 <sup>a</sup>   |
| <b>Sputum</b>               |                    |                     |                                |                                  |                                  |                      |                      |
| Baseline score              | 2.1 ± 0.5          | 2.1 ± 0.6           | 2.1 ± 0.6                      |                                  |                                  |                      |                      |
| Score at 4 days             | 1.0 ± 0.8          | 1.4 ± 0.7           | 1.3 ± 0.7                      | -0.4 ± 0.1 (-0.62 to -0.18)      | -0.2 ± 0.1 (-0.43 to 0.00)       | 0.001                | 0.051                |
| Score at 7 days             | 0.3 ± 0.5          | 0.7 ± 0.7           | 0.6 ± 0.8                      | -0.4 ± 0.1 (-0.62 to -0.23)      | -0.3 ± 0.1 (-0.50 to -0.09)      | < 0.001 <sup>a</sup> | 0.005 <sup>a</sup>   |
| <b>Rale/Rhonchi</b>         |                    |                     |                                |                                  |                                  |                      |                      |
| Baseline score              | 0.3 ± 0.4          | 0.2 ± 0.4           | 0.1 ± 0.4                      |                                  |                                  |                      |                      |
| Score at 4 days             | 0.0 ± 0.2          | 0.1 ± 0.3           | 0.1 ± 0.2                      | -0.1 ± 0.0 (-0.13 to 0.01)       | -0.1 ± 0.0 (-0.13 to 0.01)       | 0.101                | 0.072                |
| Score at 7 days             | 0.0 ± 0.1          | 0.0 ± 0.0           | 0.0 ± 0.0                      | 0.0 ± 0.0 (-0.02 to 0.04)        | 0.0 ± 0.0 (-0.02 to 0.04)        | 0.376                | 0.481                |
| <b>Chest pain</b>           |                    |                     |                                |                                  |                                  |                      |                      |
| Baseline score              | 0.7 ± 0.6          | 0.7 ± 0.7           | 0.7 ± 0.7                      |                                  |                                  |                      |                      |
| Score at 4 days             | 0.1 ± 0.3          | 0.2 ± 0.4           | 0.2 ± 0.5                      | -0.1 ± 0.1 (-0.18 to 0.07)       | -0.1 ± 0.1 (-0.22 to 0.05)       | 0.361                | 0.224                |
| Score at 7 days             | 0.0 ± 0.0          | 0.0 ± 0.2           | 0.1 ± 0.4                      | -0.0 ± 0.0 (-0.07 to 0.01)       | -0.1 ± 0.1 (-0.15 to 0.03)       | 0.143                | 0.225                |
| <b>Dyspnea</b>              |                    |                     |                                |                                  |                                  |                      |                      |
| Baseline score              | 0.3 ± 0.5          | 0.2 ± 0.5           | 0.2 ± 0.4                      |                                  |                                  |                      |                      |
| Score at 4 days             | 0.0 ± 0.2          | 0.0 ± 0.2           | 0.0 ± 0.2                      | -0.0 ± 0.0 (-0.08 to 0.04)       | -0.0 ± 0.0 (-0.07 to 0.05)       | 0.508                | 0.713                |
| Score at 7 days             | 0.0 ± 0.0          | 0.0 ± 0.1           | 0.0 ± 0.0                      | -0.0 ± 0.0 (-0.05 to 0.01)       | 0.00 ± NA                        | 0.180                | NA                   |

Values are presented as mean ± standard deviation.

*P. sidoides*, *Pelargonium sidoides*; CI, confidence interval; BSS, bronchitis severity score; NA, not applicable.

<sup>a</sup>The difference was calculated as the value in the DW16011 group minus the value in the DW1601 group.

<sup>b</sup>The difference was calculated as the value in the *P. sidoides* group minus the value in the DW1601 group.

<sup>c</sup>p value was calculated using analysis of covariance for the difference of score between DW1601 group and DW16011 group.

<sup>d</sup>p value was calculated using analysis of covariance for the difference of score between DW1601 group and *P. sidoides* group.
